# Supplementary material for: Magnetic properties of N-doped graphene with high Curie temperature
Source: PubMed Central journal article supplement (PMC4764835; doi:10.1038/srep21832), 2016-02-24
Supplement: srep21832-s1.pdf [file srep21832-s1.pdf]

# Supplementary Information

## Magnetic properties of N-doped graphene with high Curie temperature

*Qinghua Miao, Lidong Wang, Zhaoyuan Liu, Bing Wei, Fubiao Xu, and Weidong Fei\**

School of Materials Science and Engineering, Harbin Institute of Technology,  
Harbin 150001, China

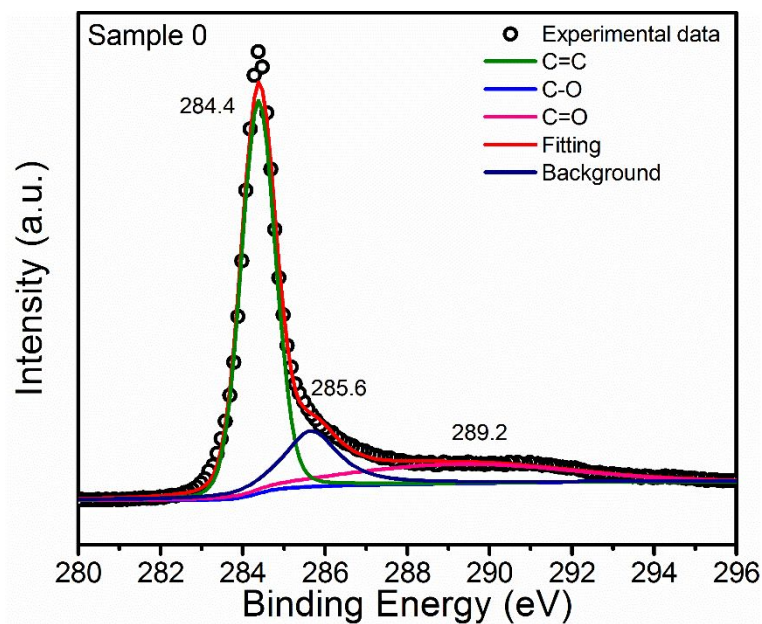

Figure S1 XPS C 1s peak of pristine graphene

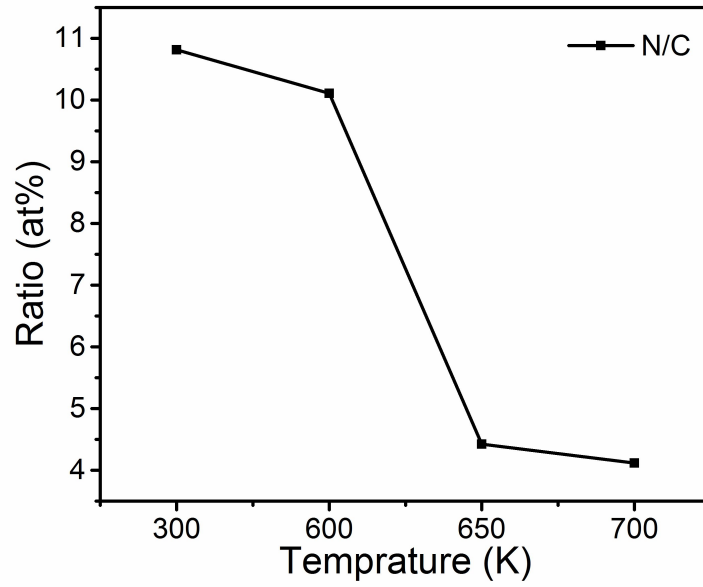

Figure S2 Ratio of N/C after annealing at different temperature of Sample 2

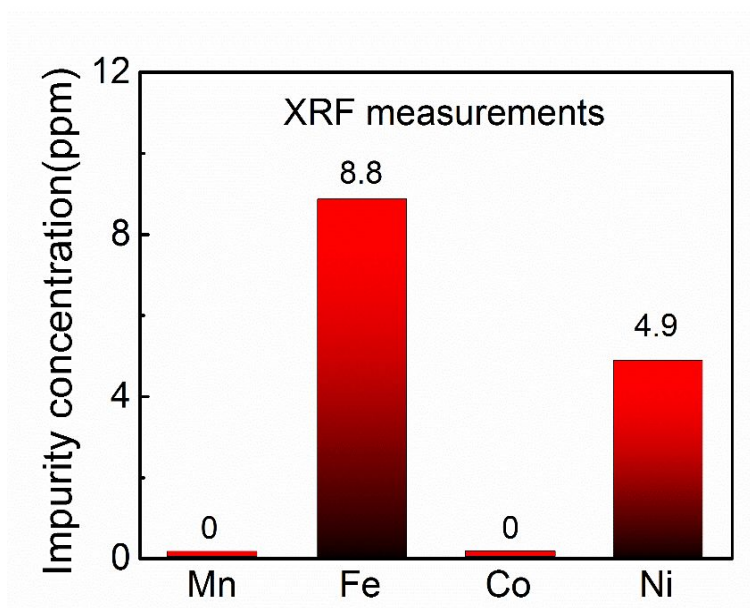

Figure S3 Content of ferromagnetic impurities of sample 2 by XRF

Table S1 XPS of Sample 2 treated by different temperature

| PP At% | T(K)  |       |       |       |
|--------|-------|-------|-------|-------|
|        | 300   | 600   | 650   | 700   |
| C      | 85.91 | 87.17 | 93.57 | 93.94 |
| N      | 9.29  | 8.81  | 4.14  | 3.87  |
| O      | 3.79  | 4.02  | 2.29  | 2.2   |
